# Supplementary material for: TCF-1 limits the formation of Tc17 cells via repression of the MAF–RORγt axis
Source: PubMed Central journal article supplement (PMC6605755; doi:10.1084/jem.20181778), 2019-05-29
Supplement: JEM_20181778_sm.pdf [file JEM_20181778_sm.pdf]

## Supplemental material

Mielke et al., <https://doi.org/10.1084/jem.20181778>

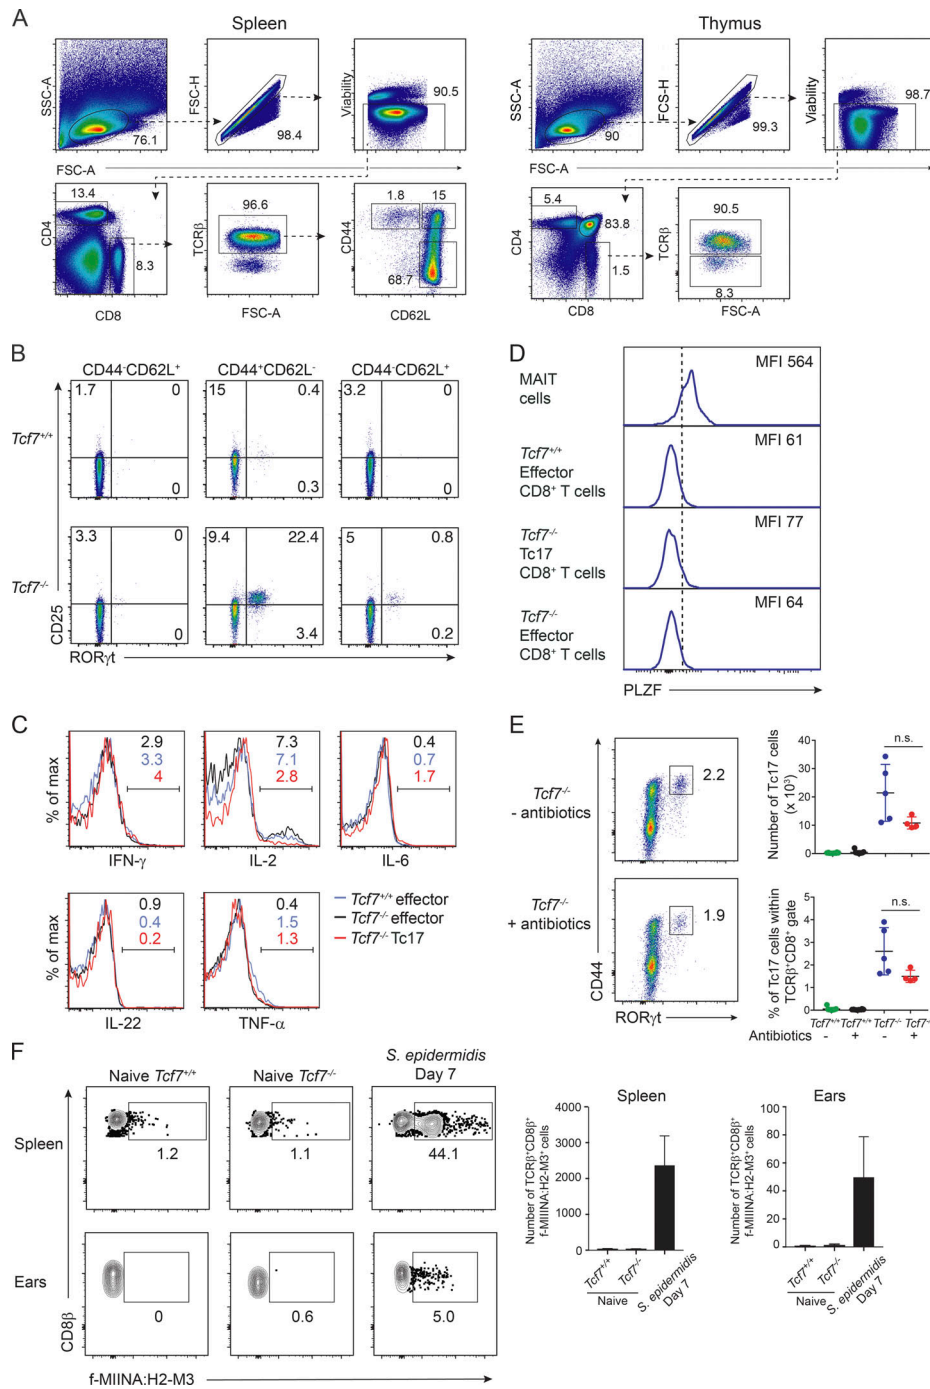

**Figure S1. Transcriptional and functional phenotype of Tc17 cells.** **(A)** Representative gating strategy for CD4<sup>+</sup> and CD8<sup>+</sup> T cell from mouse spleen and thymus. **(B)** RORγt and CD25 expression in WT and *Tcf7*<sup>-/-</sup> naive (TCRβ<sup>+</sup>CD4<sup>+</sup>CD8<sup>+</sup>CD44<sup>-</sup>CD62L<sup>+</sup>), effector (TCRβ<sup>+</sup>CD4<sup>+</sup>CD8<sup>+</sup>CD44<sup>+</sup>CD62L<sup>-</sup>), and memory (TCRβ<sup>+</sup>CD4<sup>+</sup>CD8<sup>+</sup>CD44<sup>+</sup>CD62L<sup>+</sup>) CD8<sup>+</sup> T cells. Data show one of three similar experiments. **(C)** Intracellular staining for cytokine expression in WT and *Tcf7*<sup>-/-</sup> deficient effector cells (TCRβ<sup>+</sup>CD4<sup>+</sup>CD8<sup>+</sup>CD44<sup>+</sup>CD62L<sup>-</sup>RORγt<sup>+</sup>) and Tc17 cells (TCRβ<sup>+</sup>CD4<sup>+</sup>CD8<sup>+</sup>CD44<sup>+</sup>CD62L<sup>-</sup>RORγt<sup>+</sup>) stimulated for 4 h with PMA and ionomycin in the presence of Brefeldin A. Data show one of two experiments with similar results (*n* = 4 mice/genotype). The frequency of cells expressing each cytokine is shown. **(D)** PLZF expression in *Tcf7*<sup>+/+</sup> MAIT cells (TCRβ<sup>+</sup>CD4<sup>+</sup>CD8<sup>+</sup>CD44<sup>+</sup>CD62L<sup>-</sup>RORγt<sup>+</sup>), *Tcf7*<sup>+/+</sup> and *Tcf7*<sup>-/-</sup> effector cells (TCRβ<sup>+</sup>CD4<sup>+</sup>CD8<sup>+</sup>CD44<sup>+</sup>CD62L<sup>-</sup>RORγt<sup>+</sup>), and *Tcf7*<sup>-/-</sup> Tc17 cells (TCRβ<sup>+</sup>CD4<sup>+</sup>CD8<sup>+</sup>CD44<sup>+</sup>CD62L<sup>-</sup>CD25<sup>+</sup>RORγt<sup>+</sup>) isolated from spleen. Data show representative profiles of one of two experiments with similar results (*n* = 4 mice/genotype). **(E)** Pregnant *Tcf7*<sup>+/+</sup> or *Tcf7*<sup>-/-</sup> mice were treated with a combination of antibiotics in their drinking water, or left untreated, for up to 1 wk before, and continued for 4 wk after birth. Flow-cytometric analyses (left panels) show dot plots of Tc17 cells from antibiotic treated and untreated mice. Data are representative of two similar experiments (*n* = 4–9 mice/group for each experiment). Total number and frequency of Tc17 cells in spleen of 4-wk-old pups (right panels) showing the mean ± SD (*n* = 4–9 mice/group for each experiment). P values were calculated using ANOVA with Kruskal–Wallis test. **(F)** Representative contour plots (left panels) and total cell number (right panels) of f-MIINA:H2-M3 tetramer<sup>+</sup> CD8<sup>+</sup> T cells from spleen and ears of naive *Tcf7*<sup>+/+</sup>, *Tcf7*<sup>-/-</sup> and WT mice 7 d after association with *S. epidermidis*. Contour plots are gated on live TCRβ<sup>+</sup>CD8β<sup>+</sup> cells. Histograms show the mean ± SD of samples pooled from one of two similar experiments (*n* = 2–4 mice per group per experiment). SSC-A, side scatter-area; FSC-H, forward scatter height; FSC-A, forward scatter area.

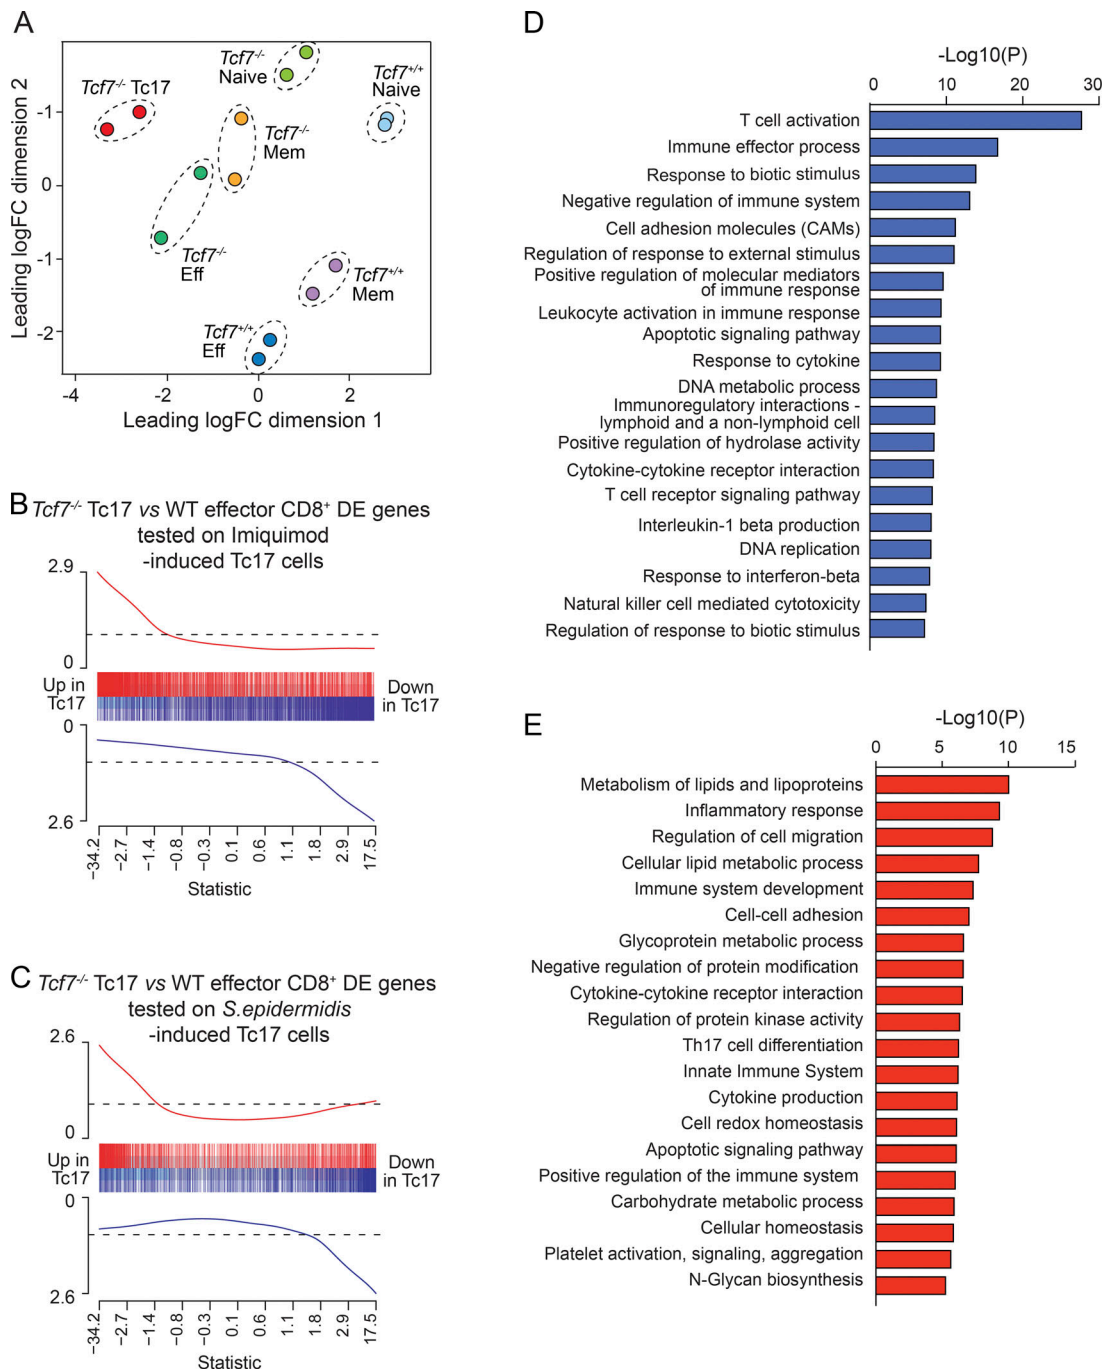

Figure S2. **Gene network analysis of *Tcf7<sup>-/-</sup>* Tc17 cells.** (A) Multidimensional scaling analysis of RNA-seq data from *Tcf7<sup>-/-</sup>* Tc17 cells (TCR $\beta$ <sup>+</sup>CD4<sup>+</sup>CD8<sup>+</sup>CD44<sup>+</sup>CD62L<sup>-</sup>CD25<sup>+</sup>) and naive (TCR $\beta$ <sup>+</sup>CD4<sup>+</sup>CD8<sup>+</sup>CD44<sup>+</sup>CD62L<sup>+</sup>CD25<sup>-</sup>), effector (TCR $\beta$ <sup>+</sup>CD4<sup>+</sup>CD8<sup>+</sup>CD44<sup>+</sup>CD62L<sup>-</sup>CD25<sup>-</sup>), and memory (TCR $\beta$ <sup>+</sup>CD4<sup>+</sup>CD8<sup>+</sup>CD44<sup>+</sup>CD62L<sup>+</sup>CD25<sup>-</sup>) CD8<sup>+</sup> T cells from *Tcf7<sup>+/+</sup>* and *Tcf7<sup>-/-</sup>* mice. Each point represents an individual sample and samples are color coded by population. Distances on the plot show the leading log<sub>2</sub>-fold change (logFC) between samples. (B and C) Gene set enrichment analysis comparing *Tcf7<sup>-/-</sup>* Tc17 versus WT effector cell DE genes with DE genes in B, imiquimod-induced skin Tc17 cells versus effector CD8<sup>+</sup> T cells (left panel,  $P < 0.0001$ ) and C, DE genes in topical *S. epidermidis*-induced Tc17 versus effector CD8<sup>+</sup> T cells (Linehan et al., 2018; right panel,  $P < 0.0001$ ). (D and E) Top 20 gene ontology categories defined by Metascape analysis ranked by P value (log<sub>10</sub>) for DE genes that were down-regulated (D) and up-regulated (E) in *Tcf7<sup>-/-</sup>* Tc17 cells.

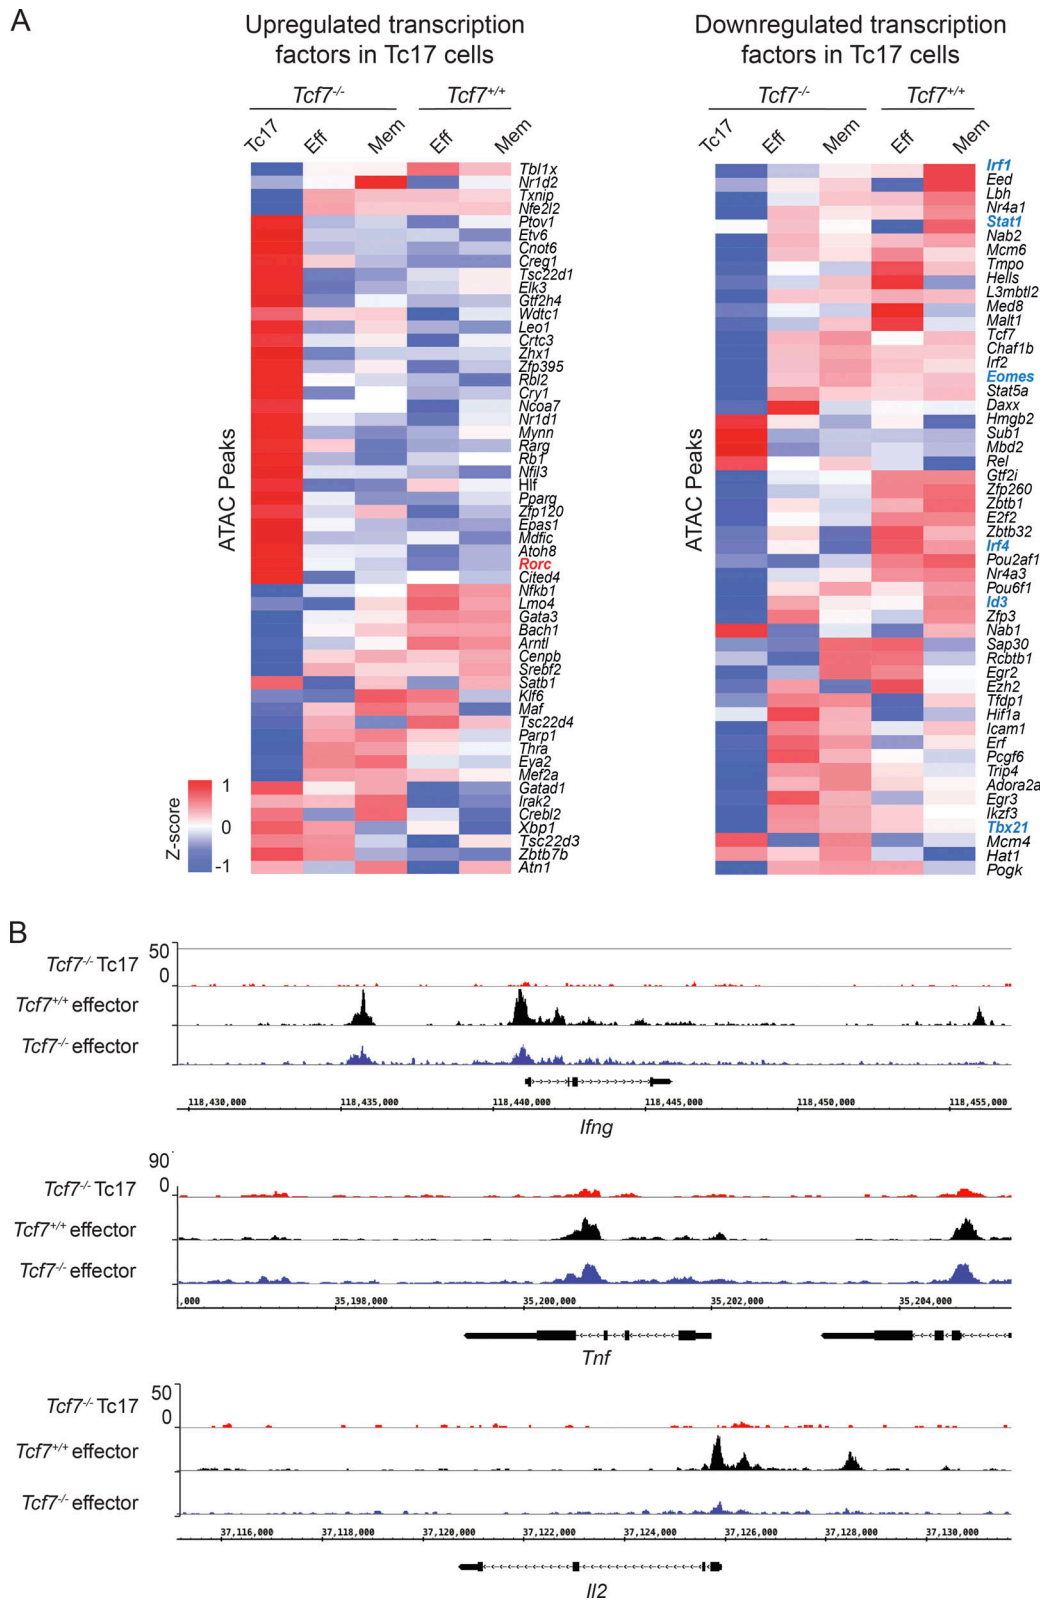

Figure S3. **TCF-1 enhances chromatin accessibility of genes required for function of effector CD8<sup>+</sup> T cells.** **(A)** Heat map of regions of chromatin accessibility across the genomes of *Tcf7*<sup>-/-</sup> Tc17 cells (TCRβ<sup>+</sup>CD4<sup>-</sup>CD8<sup>+</sup>CD44<sup>+</sup>CD62L<sup>-</sup>CD25<sup>+</sup>), effector (TCRβ<sup>+</sup>CD4<sup>-</sup>CD8<sup>+</sup>CD44<sup>+</sup>CD62L<sup>-</sup>CD25<sup>-</sup>), and memory (TCRβ<sup>+</sup>CD4<sup>-</sup>CD8<sup>+</sup>CD44<sup>+</sup>CD62L<sup>+</sup>CD25<sup>-</sup>) CD8<sup>+</sup> T cells from *Tcf7*<sup>+/+</sup> and *Tcf7*<sup>-/-</sup> mice. Average relative peak abundance (Z-score) calculated from two independent biological replicates from log<sub>2</sub>-CPM value of peak regions is shown, color-coded according to the legend. Rows are scaled to have a mean of 0 and an SD of 1. Selected transcription factors are shown that display an increased gene expression in Tc17 cells (left panel) or decreased gene expression in Tc17 cells compared with WT effector CD8<sup>+</sup> T cells (right panel). **(B)** Genome browser of normalized ATAC-seq reads across the *lfn3*, *Tnf*, and *Il2* loci from *Tcf7*<sup>-/-</sup> Tc17 cells, and effector cells from *Tcf7*<sup>+/+</sup> and *Tcf7*<sup>-/-</sup> mice.

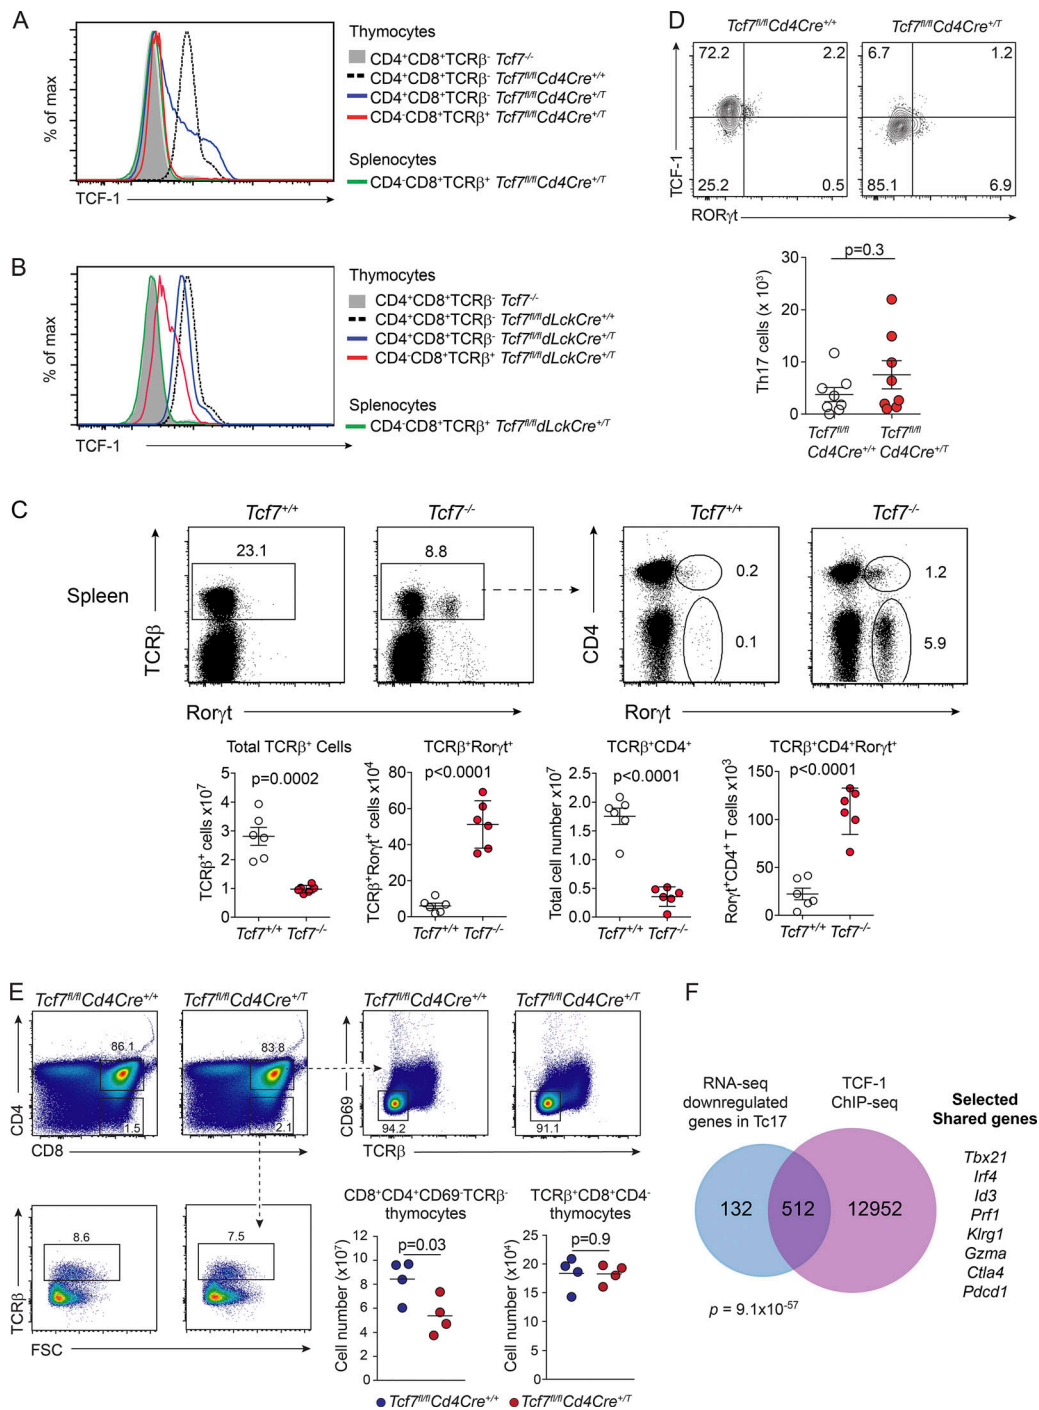

Figure S4. **Deletion efficiency and T cell development in *Tcf7<sup>fl/fl</sup>CD4Cre<sup>+/T</sup>* mice.** (A and B) Flow-cytometric profiles of expression of TCF-1 in thymocytes and splenocytes from (A) *Tcf7<sup>fl/fl</sup>CD4Cre<sup>+/T</sup>* and (B) *Tcf7<sup>fl/fl</sup>dLckCre<sup>+/T</sup>* mice. Data show representative profiles from one of two independent experiments ( $n = 4$ /genotype). (C) Flow-cytometric marker expression, including RORyt in CD4<sup>+</sup> T cells isolated from the spleen of WT and *Tcf7<sup>-/-</sup>* mice (top panel). Total cell numbers are shown in the bottom panel. Data show representative plots (upper panels) and the mean  $\pm$  SEM of individuals pooled from three independent experiments (lower panels;  $n = 6$ ; P values calculated using Student's t test). (D) Flow-cytometric analyses of Th17 (TCRβ<sup>+</sup>CD4<sup>+</sup>CD8<sup>-</sup>RORyt<sup>+</sup>) cells isolated from the spleen of *Tcf7<sup>fl/fl</sup>CD4Cre<sup>+/+</sup>* and *Tcf7<sup>fl/fl</sup>CD4Cre<sup>+/T</sup>* mice (upper panels). Enumeration of Th17 cells (lower panel) showing the mean  $\pm$  SEM of samples pooled from two independent experiments ( $n = 8$  mice/genotype). (E) Representative dot plots and total number of DP thymocytes (CD8<sup>+</sup>CD4<sup>+</sup>CD69<sup>+</sup>TCRβ<sup>-</sup>) and mature CD8<sup>+</sup> T cells (TCRβ<sup>+</sup>CD8<sup>+</sup>CD4<sup>-</sup>) from *Tcf7<sup>fl/fl</sup>CD4Cre<sup>+/T</sup>* and control mice. Data are representative of two independent experiments ( $n = 4$  mice/group/experiment). Exact P values were calculated using the Mann-Whitney U test. (F) Venn diagram analyses of down-regulated genes in Tc17 cells (*Tcf7<sup>-/-</sup>* Tc17 cells versus *Tcf7<sup>+/+</sup>* effector CD8<sup>+</sup> T cells from RNA-seq analysis compared with TCF-1 target genes identified by published ChIP-seq datasets; Dose et al., 2014). Selected shared TCF-1 target genes down-regulated by Tc17 cells are shown.

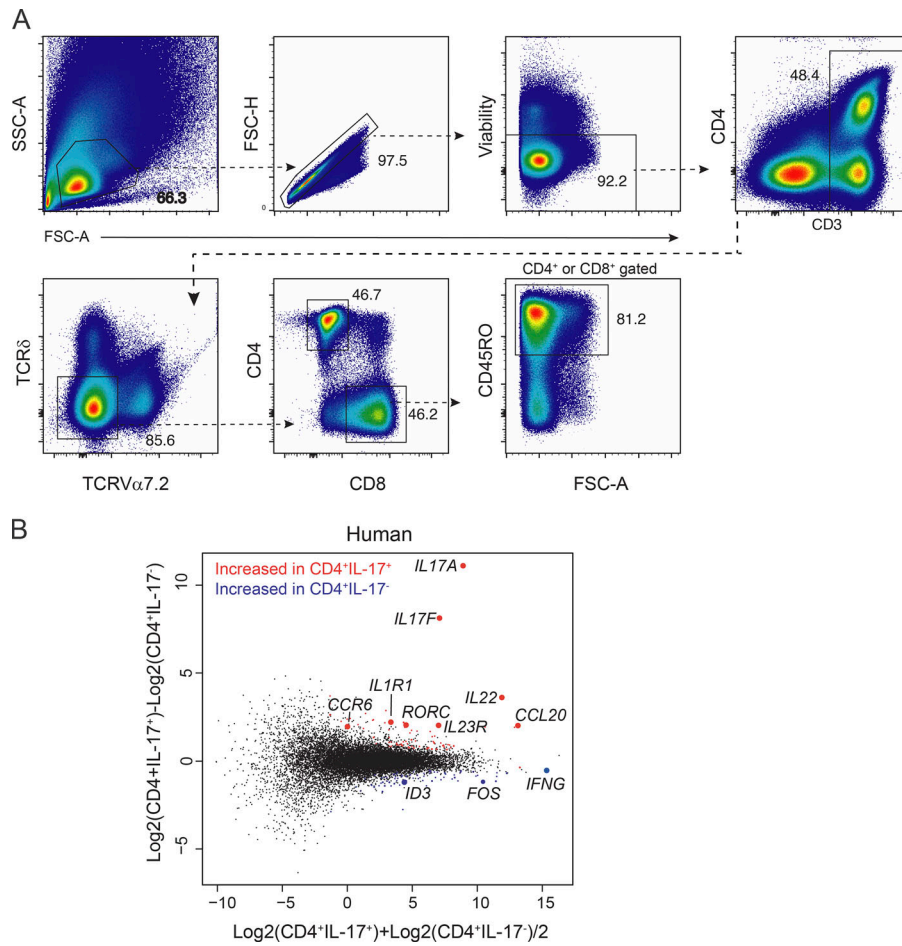

Figure S5. **Differential gene expression in human IL-17<sup>-</sup> CD4<sup>+</sup> versus IL-17<sup>+</sup> CD4<sup>+</sup> cells.** (A) Representative gating strategy of human spleen CD8<sup>+</sup> and CD4<sup>+</sup> T cells. (B) Mean difference plot highlighting genes significantly increased in human spleen IL-17<sup>+</sup>CD4<sup>+</sup> cells (red, CD3<sup>+</sup>CD4<sup>+</sup>CD8<sup>-</sup>V $\alpha$ 7.2<sup>-</sup>TCR $\gamma$  $\delta$ <sup>-</sup>IL-17<sup>+</sup>) versus genes increased in human spleen IL-17<sup>-</sup> CD4<sup>+</sup> cells (blue, CD3<sup>+</sup>CD4<sup>+</sup>CD8<sup>-</sup>V $\alpha$ 7.2<sup>-</sup>TCR $\gamma$  $\delta$ <sup>-</sup>IL-17<sup>-</sup>). Data show log<sub>2</sub> fold change compared with mean expression.



Table S1. **De novo motif enrichment using HOMER from ATAC-seq peaks enriched in Tc17 cells**

| <b>Motif name</b>     | <b>Consensus (5'- and -3')</b> | <b>P value</b> | <b>% of target sequences with motif</b> |
|-----------------------|--------------------------------|----------------|-----------------------------------------|
| Flt1 (ETS)            | NRYTTCCGGH                     | 1e-557         | 51.72%                                  |
| ETS1 (ETS)            | ACAGGAAGTG                     | 1e-511         | 49.23%                                  |
| ERG (ETS)             | ACAGGAAGTG                     | 1e-442         | 59.59%                                  |
| RORgt (NR)            | AAYTAGGTCA                     | 1e-438         | 13.96%                                  |
| Ets1-distal (ETS)     | MACAGGAAGT                     | 1e-437         | 23.11%                                  |
| GABPA (ETS)           | RACCGGAAGT                     | 1e-434         | 43.29%                                  |
| ETV1 (ETS)            | AACCGGAAGT                     | 1e-427         | 55.53%                                  |
| EWS:FLI1-fusion (ETS) | VACAGGAAAT                     | 1e-417         | 32.03%                                  |
| EWS:ERG-fusion (ETS)  | ATTCCTGTN                      | 1e-382         | 34.31%                                  |
| CTCF (Zf)             | AYAGTGCCMYCTRGTGGCCA           | 1e-328         | 14.17%                                  |
| RUNX-AML (Runt)       | GCTGTGGTTW                     | 1e-315         | 33.49%                                  |
| RUNX1 (Runt)          | AAACCACARM                     | 1e-312         | 42.86%                                  |
| RUNX (Runt)           | SAAACCACAG                     | 1.00E-307      | 33.69%                                  |
| Elk1 (ETS)            | HACTTCCGGY                     | 1.00E-299      | 29.15%                                  |
| ETS (ETS)             | AACCGGAAGT                     | 1.00E-270      | 20.64%                                  |
| ELF1 (ETS)            | AVCCGGAAGT                     | 1.00E-267      | 26.90%                                  |
| Elk4 (ETS)            | NRYTTCCGGY                     | 1.00E-262      | 27.73%                                  |
| RUNX2 (Runt)          | NWAACCACADNN                   | 1.00E-260      | 36.45%                                  |
| ETS:RUNX (ETS,Runt)   | RCAGGATGTGGT                   | 1.00E-253      | 9.82%                                   |
| BORIS (Zf)            | CNNBRGCGCCCCCTGSTGGC           | 1.00E-237      | 15.75%                                  |
| EHF (ETS)             | AVCAGGAAGT                     | 1.00E-229      | 45.74%                                  |
| PU.1 (ETS)            | AGAGGAAGTG                     | 1.00E-227      | 24.81%                                  |
| SPDEF (ETS)           | ASWTCCTGBT                     | 1.00E-184      | 37.61%                                  |
| ELF5 (ETS)            | ACVAGGAAGT                     | 1.00E-148      | 28.70%                                  |
| Sp1 (Zf)              | GGCCCCGCCCC                    | 1.00E-59       | 11.65%                                  |
| SpiB (ETS)            | AAAGRGGAAAGT                   | 1.00E-53       | 9.28%                                   |
| GATA (Zf)             | NAGATWNBATCTNN                 | 1.00E-46       | 3.66%                                   |
| Gata1 (Zf)            | SAGATAAGRV                     | 1.00E-43       | 16.29%                                  |
| Gata2 (Zf)            | BBCTTATCTS                     | 1.00E-43       | 17.86%                                  |
| Gata4 (Zf)            | NBWGATAAGR                     | 1.00E-39       | 24.99%                                  |
| GATA3 (Zf)            | AGATAASR                       | 1.00E-38       | 34.52%                                  |
| GATA (Zf),IR3         | NNNNNBAGATAWYATCTVHN           | 1.00E-33       | 4.93%                                   |
| Atf1 (bZIP)           | GATGACGTCA                     | 1.00E-32       | 16.90%                                  |
| IRF2 (IRF)            | GAAASYGAAASY                   | 1.00E-30       | 4.03%                                   |
| IRF1 (IRF)            | GAAAGTGAAAGT                   | 1.00E-28       | 4.85%                                   |
| PU.1-IRF (ETS:IRF)    | MGGAAGTGAAC                    | 1.00E-28       | 33.83%                                  |
| RFX (HTH)             | CGGTTGCCATGGCAAC               | 1.00E-27       | 3.70%                                   |
| Rfx2 (HTH)            | GTTGCCATGGCAACM                | 1.00E-26       | 3.92%                                   |
| Klf4 (Zf)             | GCCACACCCA                     | 1.00E-25       | 13.24%                                  |
| KLF5 (Zf)             | DGGGYGKGGC                     | 1.00E-25       | 34.64%                                  |
| Reverb (NR),DR2       | GTRGGTCASTGGGTCA               | 1.00E-25       | 5.01%                                   |
| Atf7 (bZIP)           | NGRTGACGTCA                    | 1.00E-25       | 12.18%                                  |
| Atf2 (bZIP)           | NRRTGACGTCA                    | 1.00E-23       | 8.98%                                   |
| Jun-AP1 (bZIP)        | GATGASTCATCN                   | 1.00E-23       | 6.72%                                   |

Table S1. **De novo motif enrichment using HOMER from ATAC-seq peaks enriched in Tc17 cells (Continued)**

| <b>Motif name</b>           | <b>Consensus (5'- and -3')</b> | <b>P value</b> | <b>% of target sequences with motif</b> |
|-----------------------------|--------------------------------|----------------|-----------------------------------------|
| Atf3 (bZIP)                 | DATGASTCATHN                   | 1.00E-22       | 15.45%                                  |
| E2F4 (E2F)                  | GGCGGAAAHA                     | 1.00E-21       | 11.35%                                  |
| Foxo1 (Forkhead)            | CTGTTTAC                       | 1.00E-21       | 42.69%                                  |
| Fra1 (bZIP)                 | NNATGASTCATH                   | 1.00E-20       | 12.97%                                  |
| Bach2 (bZIP)                | TGCTGAGTCA                     | 1.00E-20       | 5.75%                                   |
| Fosl2 (bZIP)                | NATGASTCABNN                   | 1.00E-19       | 8.48%                                   |
| GFY (?)                     | ACTACAATTCCC                   | 1.00E-19       | 2.76%                                   |
| ISRE (IRF)                  | AGTTTCASITTC                   | 1.00E-19       | 2.38%                                   |
| JunD (bZIP)                 | ATGACGTCATCN                   | 1.00E-19       | 3.16%                                   |
| CRE (bZIP)                  | CSGTGACGTCAC                   | 1.00E-18       | 6.55%                                   |
| c-Jun-CRE (bZIP)            | ATGACGTCATCY                   | 1.00E-17       | 7.85%                                   |
| ELT-3 (Gata)                | AWTGATAAGA                     | 1.00E-17       | 10.31%                                  |
| X-box (HTH)                 | GGTTGCCATGGCAA                 | 1.00E-17       | 3.82%                                   |
| AP-1 (bZIP)                 | VTGACTCATC                     | 1.00E-16       | 16.98%                                  |
| STAT1 (Stat)                | NATTTCCNGGAAAT                 | 1.00E-16       | 8.03%                                   |
| Usf2 (bHLH)                 | GTCACGTGGT                     | 1.00E-16       | 8.93%                                   |
| PQM-1 (?)                   | ACTGATAAGA                     | 1.00E-16       | 8.96%                                   |
| EKLF (Zf)                   | NWGGGTGTGGCY                   | 1.00E-15       | 7.16%                                   |
| IRF4 (IRF)                  | ACTGAAACCA                     | 1.00E-15       | 11.32%                                  |
| Bach1 (bZIP)                | AWWNTGCTGAGTCAT                | 1.00E-15       | 2.02%                                   |
| Nrf2 (bZIP)                 | HTGCTGAGTCAT                   | 1.00E-15       | 1.88%                                   |
| MafA (bZIP)                 | TGCTGACTCA                     | 1.00E-15       | 21.87%                                  |
| MITF (bHLH)                 | RTCATGTGAC                     | 1.00E-14       | 22.45%                                  |
| NF-E2 (bZIP)                | GATGACTCAGCA                   | 1.00E-14       | 2.13%                                   |
| Rfx1 (HTH)                  | KGTTGCCATGGCAA                 | 1.00E-14       | 6.21%                                   |
| CTCF-SatelliteElement (Zf?) | TGCAGTTCMVNWRTGGCCA            | 1.00E-13       | 1.00%                                   |
| Unknown-ESC-element (?)     | CACAGCAGGGGG                   | 1.00E-13       | 15.40%                                  |
| STAT5 (Stat)                | RTTTCTNAGAAA                   | 1.00E-12       | 8.91%                                   |
| E-box (bHLH)                | SSGGTCACGTGA                   | 1.00E-12       | 2.69%                                   |
| USF1 (bHLH)                 | SGTCACGTGR                     | 1.00E-11       | 11.71%                                  |
| BATF (bZIP)                 | DATGASTCAT                     | 1.00E-11       | 14.67%                                  |
| Cbf1 (bHLH)                 | TCACGTGAYH                     | 1.00E-11       | 7.11%                                   |
| ETS:E-box (ETS,bHLH)        | AGGAARCAGCTG                   | 1.00E-11       | 2.76%                                   |
| E2F6 (E2F)                  | GGCGGGAARN                     | 1.00E-11       | 12.15%                                  |
| GATA3 (Zf),DR4              | AGATGKDGAGATAAG                | 1.00E-10       | 2.52%                                   |
| SeqBias: A/T bias           | WWWWWWWWWWW                    | 1.00E-09       | 94.65%                                  |
| c-Myc (bHLH)                | VCCACGTG                       | 1.00E-09       | 11.93%                                  |
| Stat3+il21 (Stat)           | SVYTTCCNGGAARB                 | 1.00E-09       | 17.54%                                  |
| NRF1 (NRF)                  | CTGCGCATGCGC                   | 1.00E-09       | 4.96%                                   |
| DPL-1 (E2F)                 | TAGCGCGC                       | 1.00E-09       | 15.89%                                  |
| E-box                       | GCCACGTG                       | 1.00E-09       | 10.78%                                  |
| E2F1 (E2F)                  | CWGGCGGGAA                     | 1.00E-09       | 5.67%                                   |
| GFY-Staf (?,Zf)             | RACTACAATCCCAAGKGC             | 1.00E-08       | 2.38%                                   |
| FOXP1 (Forkhead)            | NYTGTITACHN                    | 1.00E-08       | 10.33%                                  |



Table S1. **De novo motif enrichment using HOMER from ATAC-seq peaks enriched in Tc17 cells (Continued)**

| <b>Motif name</b>              | <b>Consensus (5'- and -3')</b> | <b>P value</b> | <b>% of target sequences with motif</b> |
|--------------------------------|--------------------------------|----------------|-----------------------------------------|
| bHLHE40 (bHLH)                 | KCACGTGMCN                     | 1.00E-08       | 8.01%                                   |
| STAT4 (Stat)                   | NYTTCCWGGAAR                   | 1.00E-08       | 21.37%                                  |
| Stat3 (Stat)                   | CTTCCGGGAA                     | 1.00E-08       | 12.61%                                  |
| Egr2 (Zf)                      | NGCGTGGCGGR                    | 1.00E-07       | 5.54%                                   |
| Rfx5 (HTH)                     | SCCTAGCAACAG                   | 1.00E-07       | 10.33%                                  |
| MafK (bZIP)                    | GCTGASTCAGCA                   | 1.00E-07       | 7.00%                                   |
| Unknown5/Drosophila-Promoters/ | GCTGATAASV                     | 1.00E-07       | 13.67%                                  |
| CLOCK (bHLH)                   | GHCACGTG                       | 1.00E-07       | 13.60%                                  |
| E2F7 (E2F)                     | VDTTCCCGCCA                    | 1.00E-06       | 3.05%                                   |
| GFX (?)                        | ATTCTCGCGAGA                   | 1.00E-06       | 0.48%                                   |
| Unknown3                       | AYTAAACCGG                     | 1.00E-06       | 3.78%                                   |
| Atf4 (bZIP)                    | MTGATGCAAT                     | 1.00E-06       | 5.40%                                   |
| NFkB-p50,p52 (RHD)             | GGGGGAATCCCC                   | 1.00E-06       | 2.81%                                   |
| NF1 (CTF)                      | CYGGCABNSTGCCAR                | 1.00E-05       | 8.78%                                   |
| GATA:SCL (Zf,bHLH)             | CRGCTGBNGNSNNSAGATAA           | 1.00E-05       | 3.12%                                   |
| MafF (bZIP)                    | HWWTGTCAGCAWWTTT               | 1.00E-05       | 5.86%                                   |
| FHY3 (FAR1)                    | HHCACGCGCBTN                   | 1.00E-05       | 6.97%                                   |
| Tbx20 (T-box)                  | GGTGYTGACAGS                   | 1.00E-05       | 5.80%                                   |
| NFAT:AP1 (RHD,bZIP)            | SARTGGAAAWRGAGTCAB             | 1.00E-04       | 3.70%                                   |
| BMYB (HTH)                     | NHAACBGYYV                     | 1.00E-04       | 32.68%                                  |
| ABF1                           | CGTRNAAARTGA                   | 1.00E-04       | 4.34%                                   |
| ZBTB33 (Zf)                    | GGVTCTCGCAGAAC                 | 1.00E-04       | 1.18%                                   |
| Chop (bZIP)                    | ATTGCATCAT                     | 1.00E-04       | 4.11%                                   |
| NFkB-p65-Rel (RHD)             | GGAAATTTCCC                    | 1.00E-04       | 1.33%                                   |
| Tcf12 (bHLH)                   | VCAGCTGYTG                     | 1.00E-04       | 22.52%                                  |
| NFkB-p65 (RHD)                 | WGGGGATTTCCC                   | 1.00E-04       | 10.51%                                  |
| CEBP:AP1 (bZIP)                | DRTGTTGCAA                     | 1.00E-03       | 14.56%                                  |
| STAT6 (Stat)                   | TTCKNAGAA                      | 1.00E-03       | 11.55%                                  |
| Maz (Zf)                       | GGGGGGGG                       | 1.00E-03       | 29.82%                                  |
| NRF (NRF)                      | STGCGCATGCGC                   | 1.00E-03       | 5.57%                                   |
| VDR (NR)                       | ARAGGTCANWGAGTTCANN            | 1.00E-03       | 5.10%                                   |
| AMYB (HTH)                     | TGGCAGTTGG                     | 1.00E-03       | 33.52%                                  |
| CEBP:CEBP (bZIP)               | NTNATGCAAYMNNHTGMAAY           | 1.00E-02       | 2.81%                                   |
| REB1                           | KCCGGGTAAYRR                   | 1.00E-02       | 3.67%                                   |
| PRDM9 (Zf)                     | ADGGYAGYAGCATCT                | 1.00E-02       | 9.79%                                   |
| Foxa2 (Forkhead)               | CYTGTTTACWYW                   | 1.00E-02       | 16.62%                                  |
| PBX1 (Homeobox)                | GSCTGTCACTCA                   | 1.00E-02       | 2.24%                                   |
| T11SRE (IRF)                   | ACTTTCGTTTCT                   | 1.00E-02       | 0.42%                                   |
| GEI-11 (Myb?)                  | CCGACAYTYACGGG                 | 1.00E-02       | 1.19%                                   |
| Tcf3 (HMG)                     | ASWTCAAAGG                     | 1.00E-02       | 6.14%                                   |
| Tcfcp2l1 (CP2)                 | NRAACCRGTTYRAACCRGYT           | 1.00E-02       | 3.89%                                   |
| PRDM1 (Zf)                     | ACTTTCACTTTC                   | 1.00E-02       | 12.31%                                  |
| HIF2a (bHLH)                   | GCACGTACCC                     | 1.00E-02       | 7.69%                                   |
| MyoD (bHLH)                    | RRCAGCTGYTSY                   | 1.00E-02       | 17.80%                                  |

Table S1. **De novo motif enrichment using HOMER from ATAC-seq peaks enriched in Tc17 cells (Continued)**

| Motif name      | Consensus (5'- and -3') | P value  | % of target sequences with motif |
|-----------------|-------------------------|----------|----------------------------------|
| Pho4 (bHLH)     | AAGCACGTGBGD            | 1.00E-02 | 4.71%                            |
| Pbx3 (Homeobox) | SCTGTCAMTCAN            | 1.00E-02 | 5.75%                            |

Table S2. **Primer sequences for quantitative CHIP-PCR analysis**

| Genome locations | 5' primer             | 3' primer             |
|------------------|-----------------------|-----------------------|
| <i>Maf-1</i>     | GCCTCTGATCCCAGCGAGAA  | TGCTAATCGCTGCCGCTCTC  |
| <i>Maf-2</i>     | AGAGACCTGTGCCTGTTGAT  | GATGTCTCCTCTACTACTGG  |
| <i>Maf-3</i>     | TGGAAGCTTCTGAGGGCTTT  | ACTCAAGCCCTCCAGAAC    |
| <i>Maf-4</i>     | CTCAGCTGGGCTCTGCTC    | TGAGGAGATGGCTATGCCTCC |
| <i>Maf-5</i>     | GGTTGTAGCAGCTACCAAC   | ACTCTTGTAGGCTCTGGCA   |
| <i>Axin2-1</i>   | TGTGTGGAGCTCAGATTTTCG | ATGTGAGCCTCCTCTCTGGA  |
| <i>Axin2-2</i>   | AAATCCACAGCGCAGTTTTT  | TTCAACCCAGGTCCTGTTC   |

## References

- Dose, M., A.O. Emmanuel, J. Chaumeil, J. Zhang, T. Sun, K. Germar, K. Aghajani, E.M. Davis, S. Keerthivasan, A.L. Bredemeyer, et al. 2014.  $\beta$ -Catenin induces T-cell transformation by promoting genomic instability. *Proc. Natl. Acad. Sci. USA.* 111:391–396. <https://doi.org/10.1073/pnas.1315752111>
- Linehan, J.L., O.J. Harrison, S.J. Han, A.L. Byrd, I. Vujkovic-Cvijin, A.V. Villarino, S.K. Sen, J. Shaik, M. Smelkinson, S. Tamoutounour, et al. 2018. Non-classical Immunity Controls Microbiota Impact on Skin Immunity and Tissue Repair. *Cell.* 172:784–796. <https://doi.org/10.1016/j.cell.2017.12.033>
